# Supplementary material
Source: MDPI journal article supplement (https://www.mdpi.com/2311-5637/9/2/115)
Supplement: s1 [file s1]

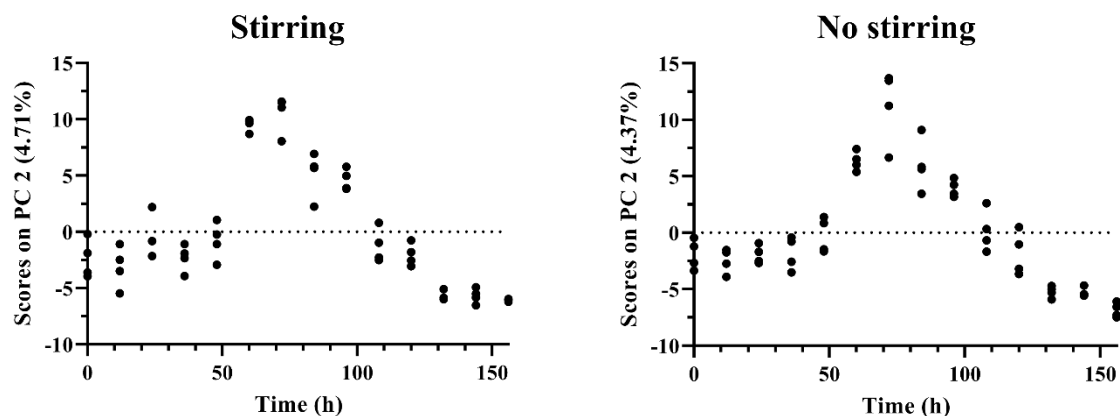

**Figure S1.** Scores plots of the second Principal Component (PC2) of stirring and no stirring PCA model.

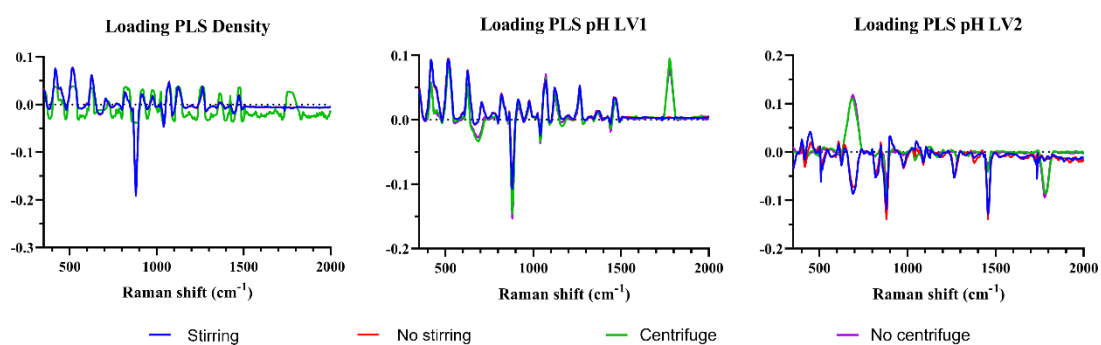

**Figure S2.** Loading plot of density (first LV) and pH (first and second) PLSR model. Different colours mean different analytical methodologies (blue – Stirring, red – No stirring, green – Centrifuge, purple – No centrifuge).
